# Supplementary material for: Generative modeling of single-cell gene expression for dose-dependent chemical perturbations
Source: PubMed Central journal article supplement — Patterns (N Y). 2023 Aug 11;4(8):100817. doi: 10.1016/j.patter.2023.100817 (PMC10436058; doi:10.1016/j.patter.2023.100817), 2023-08-11
Supplement: mmc1.pdf [file mmc1.pdf]

**Patterns, Volume 4**

**Supplemental information**

**Generative modeling of single-cell gene expression  
for dose-dependent chemical perturbations**

**Omar Kana, Rance Nault, David Filipovic, Daniel Marri, Tim Zacharewski, and Sudin  
Bhattacharya**

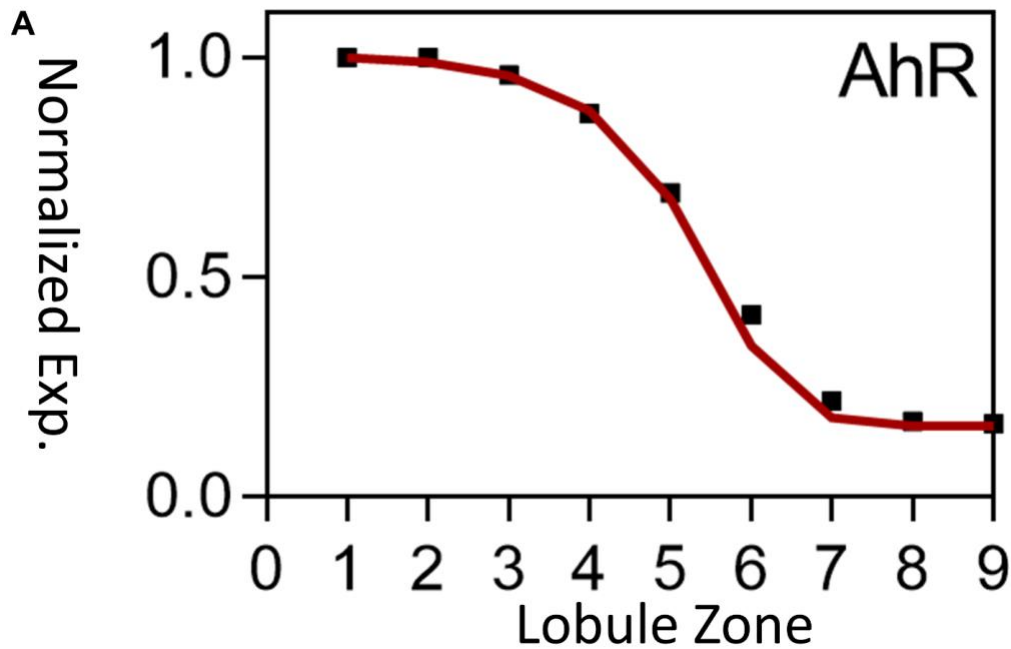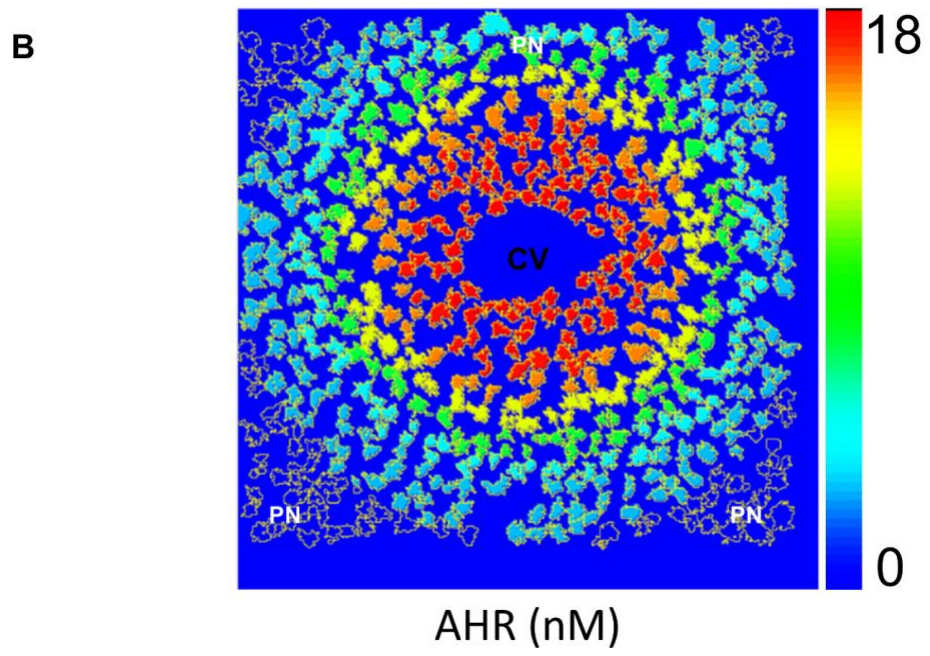

**Supplementary Figure 1. Expression of AhR across liver lobule** **A)** A zonal expression profile of normalized expression as described by Yang et al.<sup>1</sup> and Halpern et al.<sup>2</sup> Zone 0 represents the level of AhR expression in hepatocytes closest to the central vein. Zone 9 represents the level of AhR expression closest to the portal vein. **B)** A single cell resolution image of the liver lobule generated by Halpern et al. with expression levels represented by color from Yang et al. The central vein is denoted by “CV” (black) with the portal triad denoted by “PN” (white).

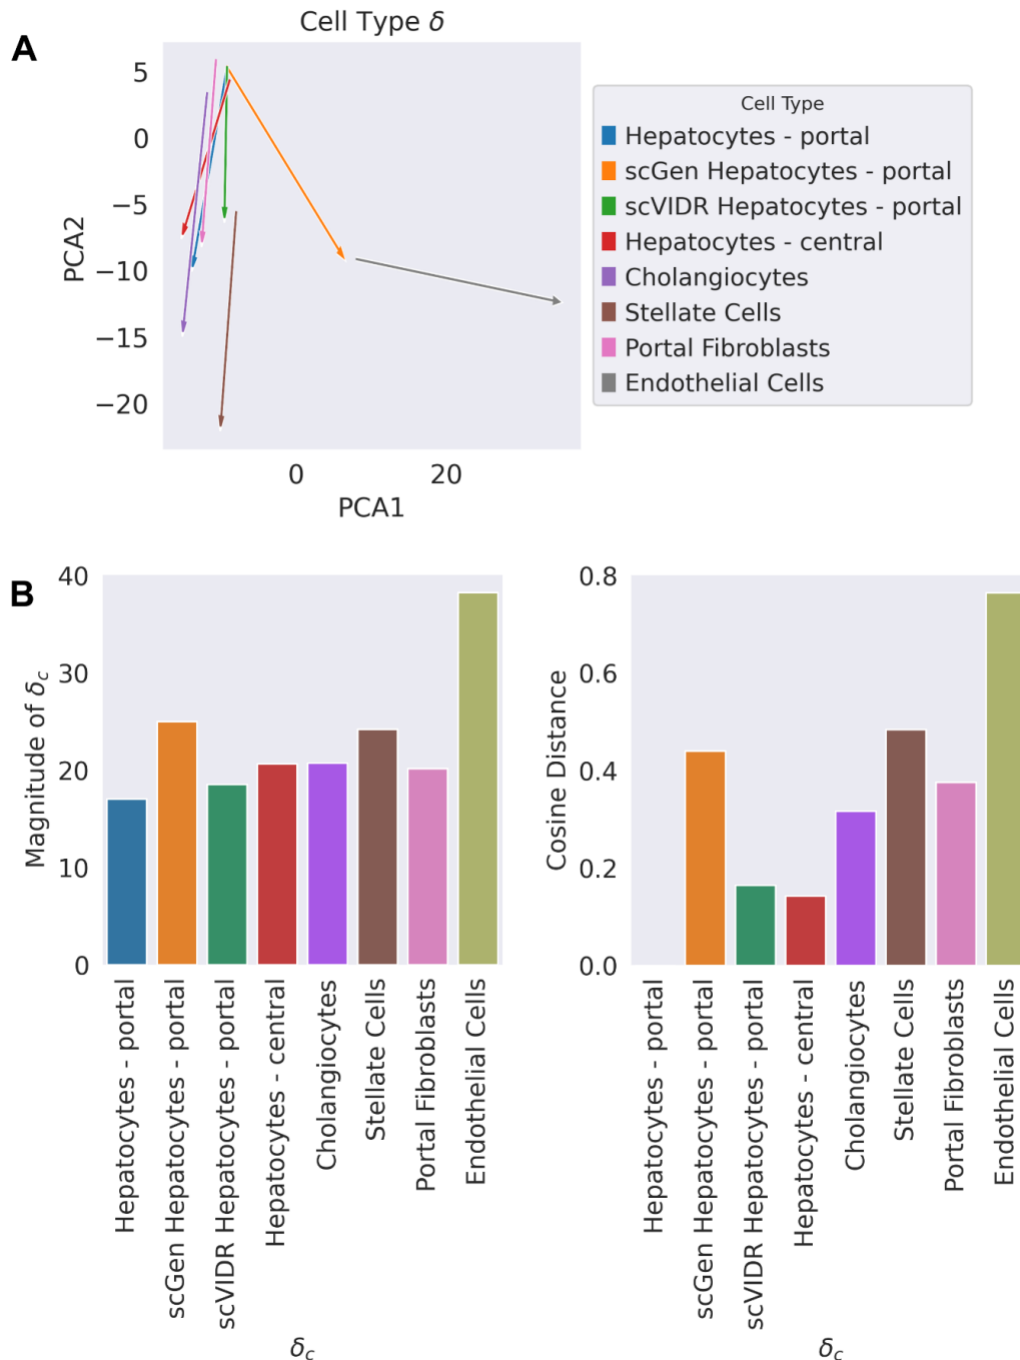

**Supplementary Figure 2.  $\delta_{scGen}$  deviates more from  $\delta_{Hepatocytes-portal}$  than  $\delta_{scVIDR}$ .** **A)** A PCA visualization of the calculated  $\delta_c$ s for a VAE trained without portal hepatocytes. “scGen Hepatocytes – portal” refers to the prediction by scGen ( $\delta_{scGen}$ ), and “scVIDR Hepatocytes – portal” refers to the prediction by scVIDR ( $\delta_{scVIDR}$ ). **B)** Bar plots of the magnitude of the  $\delta_c$ s, and the cosine distance from the  $\delta_{Hepatocytes-portal}$  for each  $\delta_c$ . A cosine distance of 0 represents a  $\delta_c$  in the same direction as  $\delta_{Hepatocytes-portal}$ , of 1 represents a  $\delta_c$  orthogonal to  $\delta_{Hepatocytes-portal}$  and of 2 represent a  $\delta_c$  in the opposite direction as  $\delta_{Hepatocytes-portal}$ .



**Supplementary Figure 3. Prediction of in vitro response of B-cells to IFN $\beta$ .** **A)** UMAP of latent space of treated and untreated single-cell expression. UMAP plots are colored by cell type, training split, and condition, respectively. **B)** PCA plot of scGen, scVIDR, scPreGAN, and CellOT predictions of B-cell expression after IFN $\beta$  treatment. **C)** scGen, scVIDR, scPreGAN, and CellOT prediction versus experimental expression data regression plot. Each point represents the mean expression for a particular gene. Red points represent the top ten differentially expressed genes. Shaded region around regression line represents the 95% confidence interval. **D)** Boxplot of  $R^2$  scores across all tissues in the PBMC treated dataset. Prediction of all highly variable genes (blue), and top 100 differentially expressed genes (orange).

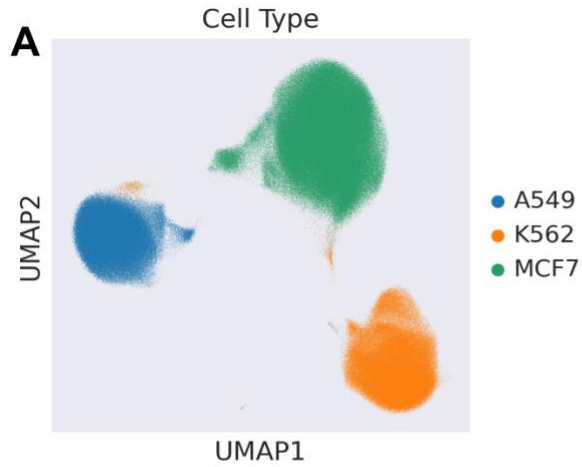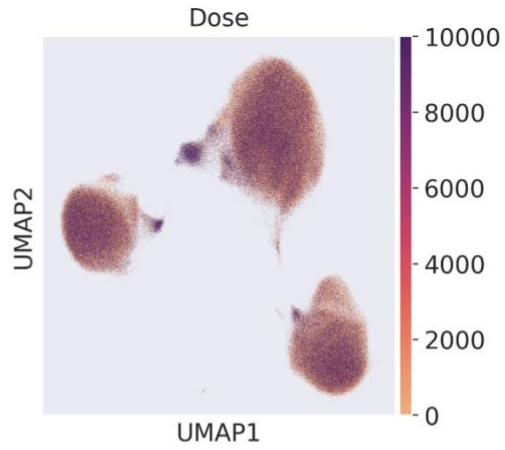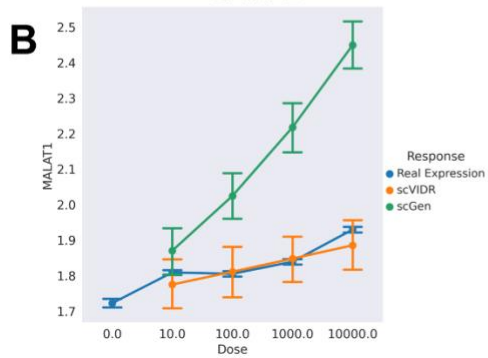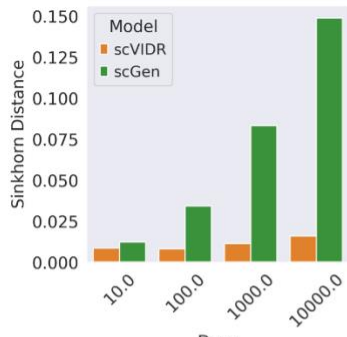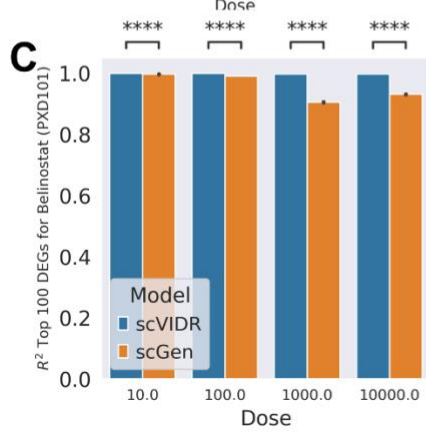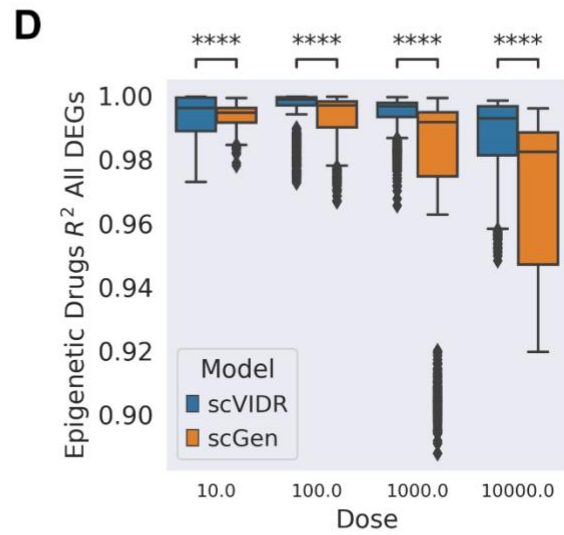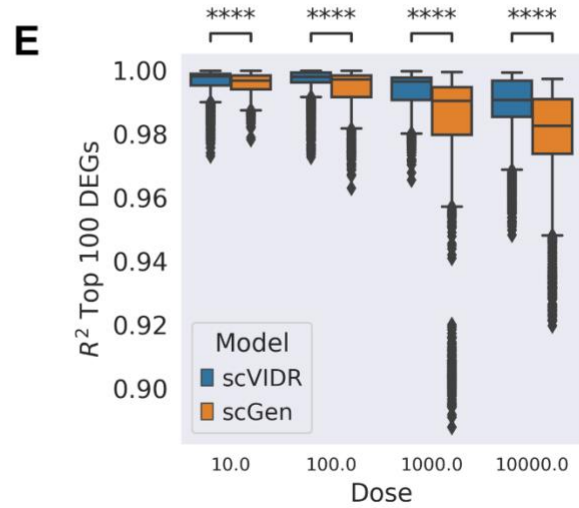

**Supplementary Figure 4. Prediction of in vitro dose-response of A549 cells to different drug treatments.** **A)** UMAP of the latent space of single-cell expression colored by cell type and dose (nM) respectively. **B)** Prediction of the dose-response of MALAT1 in response to Belinostat treatment of A549 cells. The differences between the predicted and true distribution and of MALAT1 at each dose are measured via the Sinkhorn distance. **C)** Bar plot of prediction performance of the dose-response of Belinostat administered to A549 cells on the top 100 differentially expressed genes **D)** Boxplot of prediction performance of the top 100 differentially expressed genes for the A549 dose-response in all test dataset epigenetic pathway drugs. **E)** Boxplot of prediction performance of the top 100 differentially expressed for the A549 dose-response in all 37 test dataset drugs.

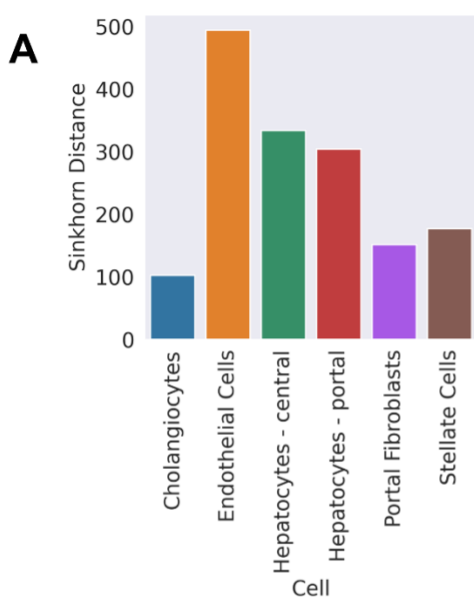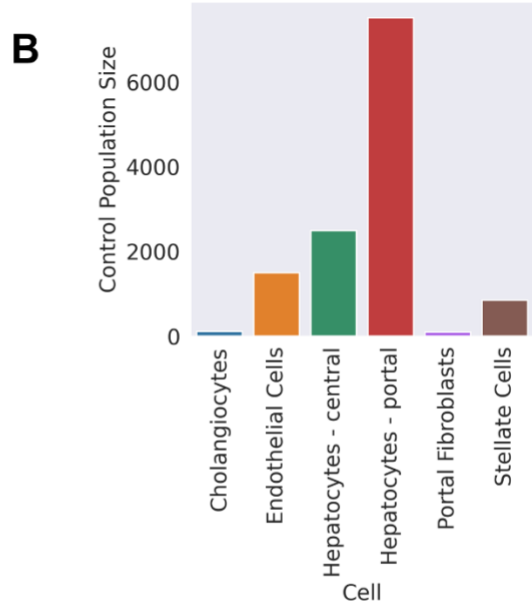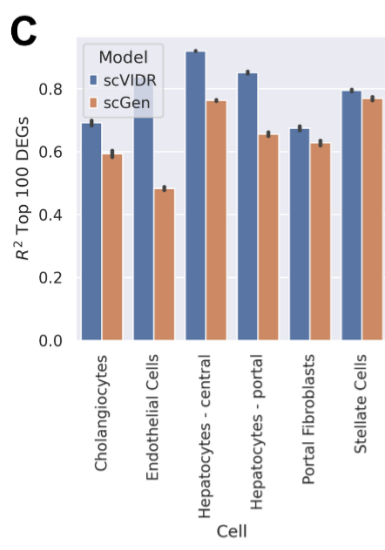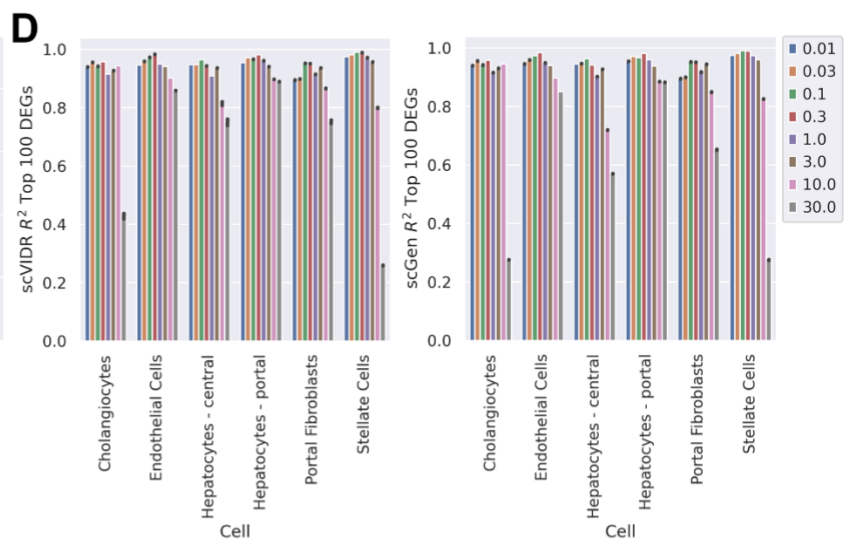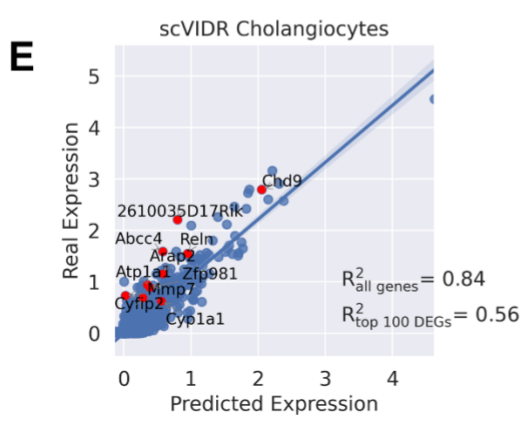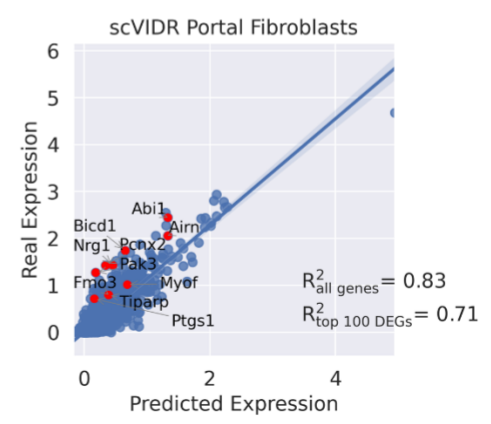



**Supplementary Figure 5. Impact of latent perturbation magnitude and control population size on overall model performance.** **A)** Sinkhorn distance between the latent distributions of the control and 30  $\mu\text{g}/\text{kg}$  doses of TCDD of each cell type on the latent space. **B)** Bar plot of the control group cell population size for each cell type. **C)** Bar plot of mean gene  $R^2$  for each individual cell type when predicting only the 30  $\mu\text{g}/\text{kg}$  dose of TCDD. **D)** Bar plot of mean  $R^2$  for each individual cell type when predicting across the entire TCDD dose-response experiment. **E)** scVIDR prediction versus real expression regression plot of cholangiocytes and stellate cell from mice administered with a 30  $\mu\text{g}/\text{kg}$  dose of TCDD. Each point represents the mean expression of a gene. The top 10 differentially expressed genes are represented with red points.

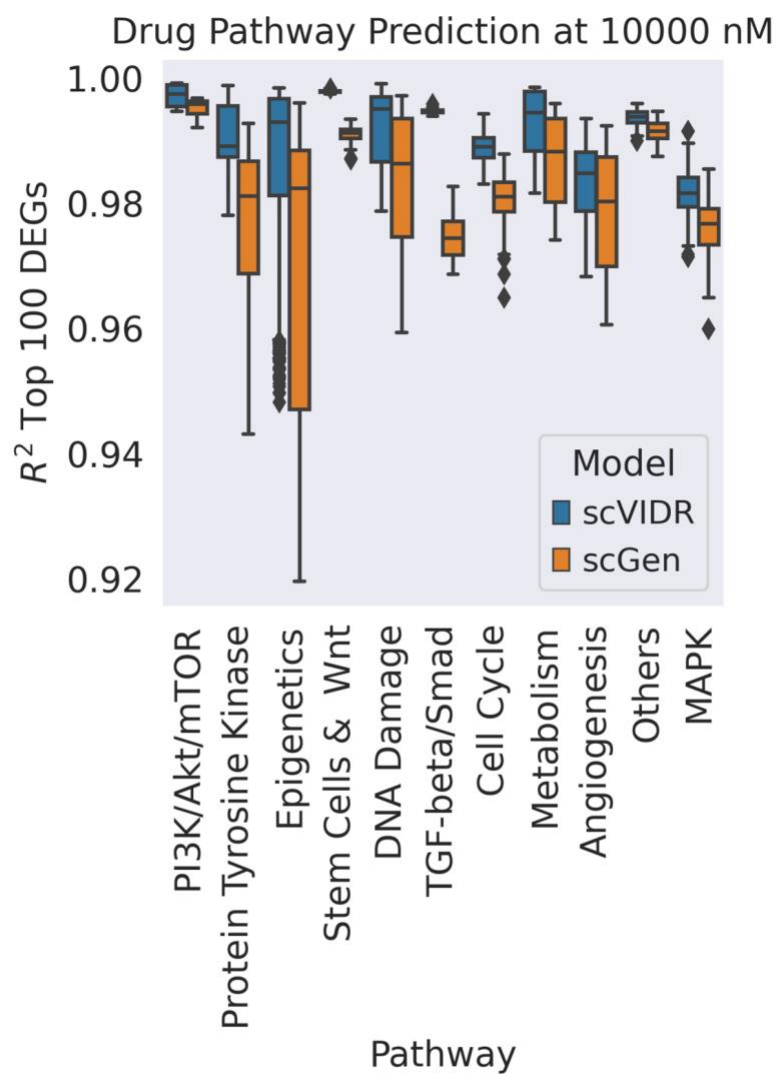

**Supplementary Figure 6. Overall drug pathway performances at the highest administered dose in sci-plex dataset. A)** A boxplot of the mean gene  $R^2$  across all drug pathways in the test dataset at a dose of 10,000 nM.

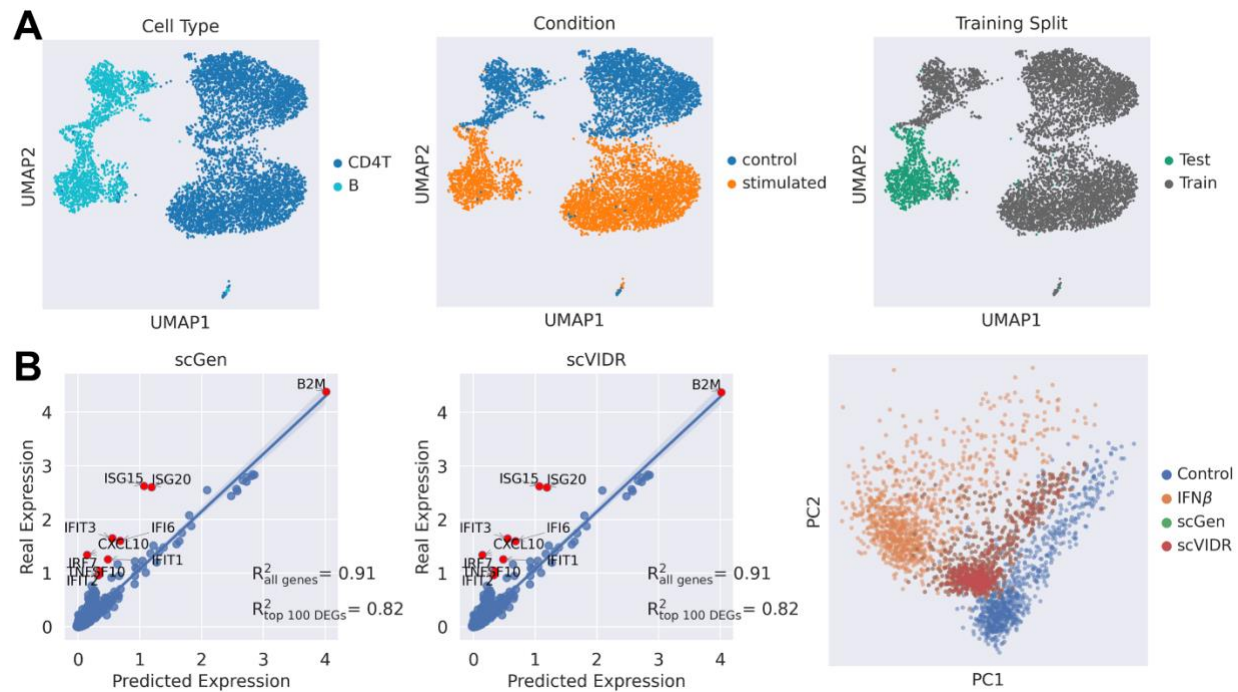

**Supplementary Figure 7. scVIDR is equivalent to scGen when training on a single cell type. A)** A UMAP of latent space of single-cell expression of two cell types from Kang et al<sup>3</sup>: CD4T and B cells. They are colored by cell type, condition, and train test split. **B)** Validation of prediction of B-cell perturbation when VAE is trained solely on CD4-T cells. A regression plot is shown for both scVIDR and scGen performance. Each point represents the mean expression of a particular gene. Red points represent the top ten differentially expressed genes. Shaded region around regression line represents the 95% confidence interval.

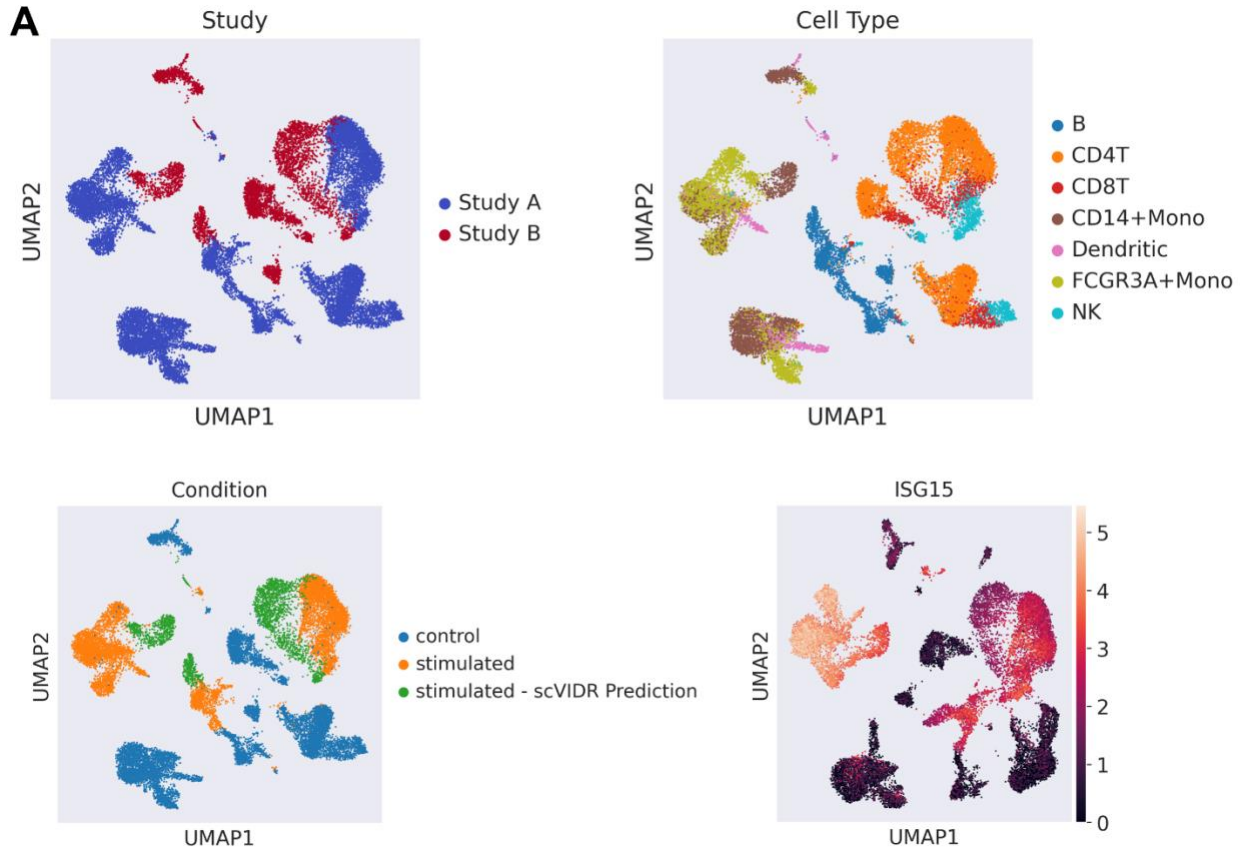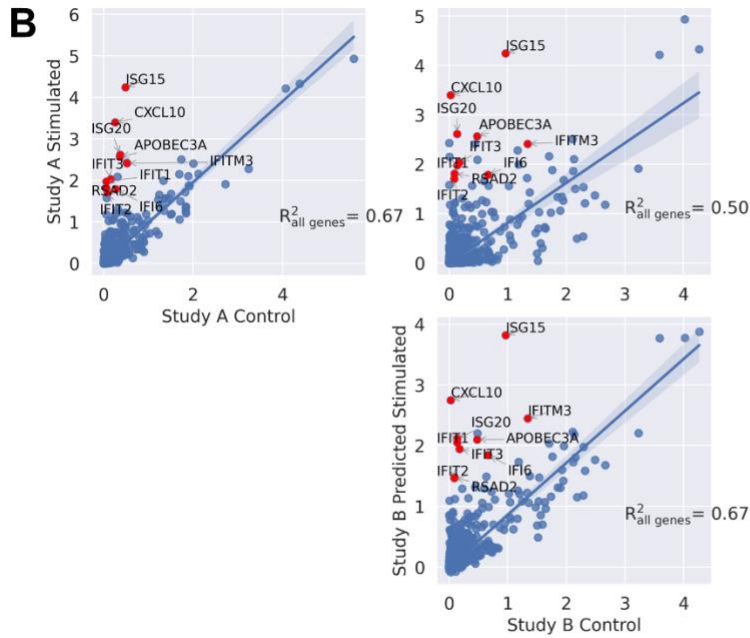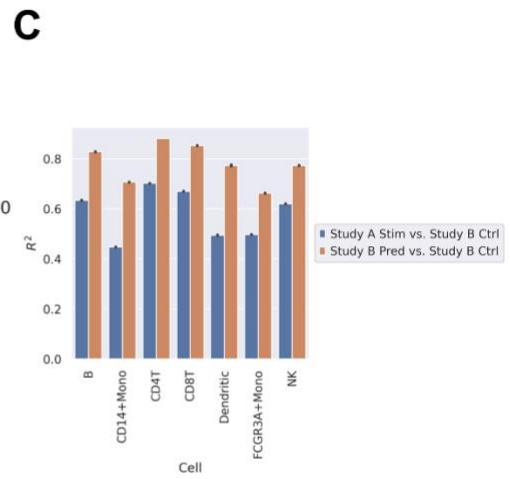

**Supplementary Figure 8. scVIDR exhibits similar capabilities to scGEN when doing cross-study predictions.** **A)** A UMAP of the latent space of single-cell expression from two studies: Kang et al<sup>3</sup> (Study A) and Zheng et al<sup>4</sup> (Study B). Study B perturbation by IFN- $\beta$  was predicted by scVIDR. The cells are colored by study, cell type, condition/prediction, and ISG15 expression. **B)** A regression plot comparing Study A with Study B in terms of FGRC+Mono cells. Each point represents the mean expression of a particular gene. Red points represent the top ten differentially expressed genes. Shaded region around line represents the 95% confidence interval. **C)** A barplot representing the correlation between Study A cells stimulated by IFN- $\beta$  with Study B control and the correlation between scVIDR predicted Study B cells stimulated by IFN- $\beta$  and Study B control.

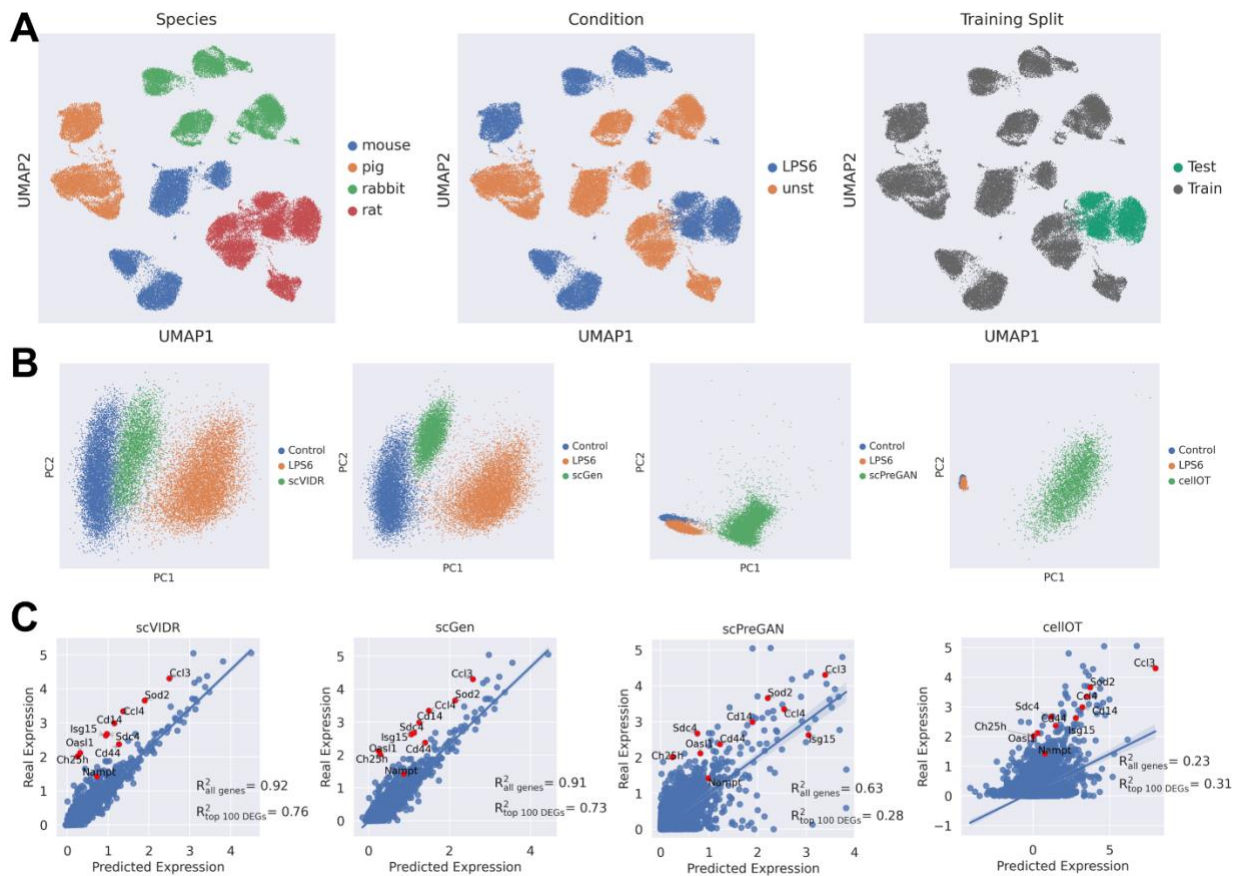

**Supplementary Figure 9. scVIDR predicts the effects of LPS6 on rat cells from mouse, rabbit, and pig cells better than other state-of-the-art algorithms. A)** UMAP of latent space of treated and untreated single-cell expression. UMAP plots are colored by species, training split, and condition, respectively. **B)** PCA plot of scGen, scVIDR, scPreGAN, and CellOT predictions of rat after LPS6 treatment. **C)** scGen, scVIDR, scPreGAN, and CellOT prediction versus experimental expression data regression plot. Each point represents the mean expression for a particular gene. Red points represent the top ten differentially expressed genes. Shaded region around regression line represents the 95% confidence interval.

## References

1. Yang, Y., Filipovic, D., and Bhattacharya, S. (2021). A Negative Feedback Loop and Transcription Factor Cooperation Regulate Zonal Gene Induction by 2, 3, 7, 8-Tetrachlorodibenzo-p-Dioxin in the Mouse Liver. *Hepatology*. [10.1002/hep4.1848](https://doi.org/10.1002/hep4.1848).
2. Halpern, K.B., Shenhav, R., Matcovitch-Natan, O., Tóth, B., Lemze, D., Golan, M., Massasa, E.E., Baydatch, S., Landen, S., Moor, A.E., et al. (2017). Single-cell spatial reconstruction reveals global division of labour in the mammalian liver. *Nature*. [10.1038/nature21065](https://doi.org/10.1038/nature21065).
3. Kang, H.M., Subramaniam, M., Targ, S., Nguyen, M., Maliskova, L., McCarthy, E., Wan, E., Wong, S., Byrnes, L., Lanata, C.M., et al. (2018). Multiplexed droplet single-cell RNA-sequencing using natural genetic variation. *Nature Biotechnology*. [10.1038/nbt.4042](https://doi.org/10.1038/nbt.4042).
4. Zheng, G.X.Y., Terry, J.M., Belgrader, P., Ryvkin, P., Bent, Z.W., Wilson, R., Ziraldo, S.B., Wheeler, T.D., McDermott, G.P., Zhu, J., et al. (2017). Massively parallel digital transcriptional profiling of single cells. *Nature Communications*. [10.1038/ncomms14049](https://doi.org/10.1038/ncomms14049).
